# Supplementary material
Source: MDPI journal article supplement (https://www.mdpi.com/2076-3417/11/19/9116)
Supplement: s1 [file s1]

## Supplementary Information (SI)

# **A Facile HPLC-UV-Based Method for Determining the Concentration of the Bacterial Universal Signal Autoinducer-2 in Environmental Samples**

**Kibaek Lee<sup>1</sup>, Chung-Hak Lee<sup>2</sup>, and Kwang-Ho Choo<sup>3, 4,\*</sup>**

<sup>1</sup> Department of Biotechnology and Bioengineering, Chonnam National University, Gwangju 61186, Re-public of Korea; kibaek@jnu.ac.kr

<sup>2</sup> School of Chemical and Biological Engineering, Seoul National University, Seoul 08826, Republic of Korea; leech@snu.ac.kr

<sup>3</sup> Department of Environmental Engineering, Kyungpook National University, Daegu 41566, Republic of Korea; chookh@knu.ac.kr

<sup>4</sup> Advanced Institute of Water Industry, Kyungpook National University, Daegu 41566, Republic of Korea; chookh@knu.ac.kr

\* Correspondence: Kwang-Ho Choo; E-mail: chookh@knu.ac.kr; Tel.: +82-53-950-7585

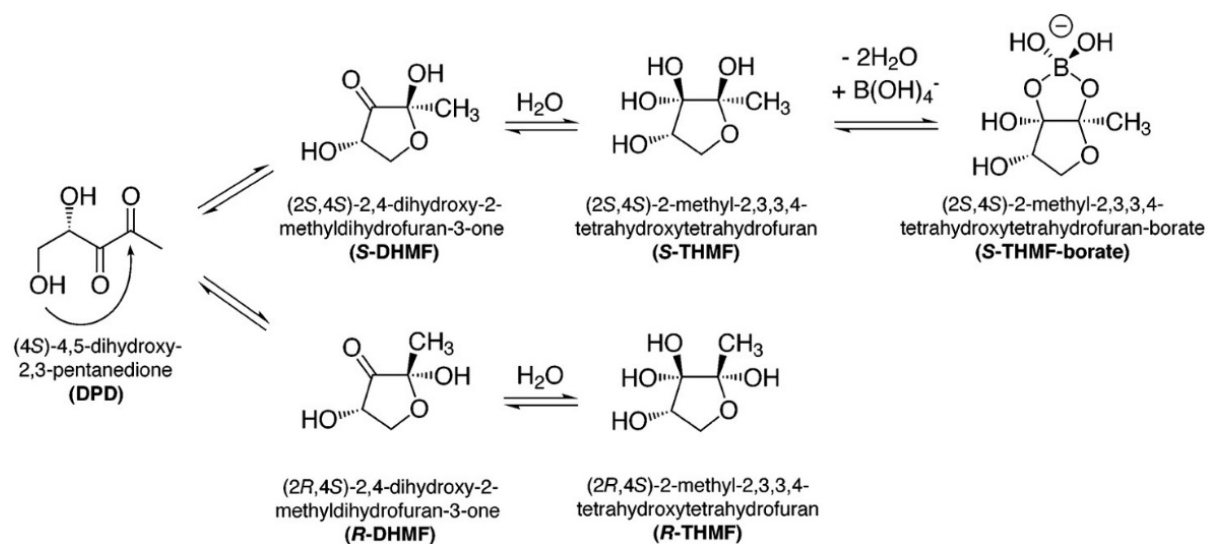

**Figure S1.** Equilibrium form of (S)-4,5-dihydroxy-2,3-pentandione (DPD) and its derivatives in water and in the presence of borate.

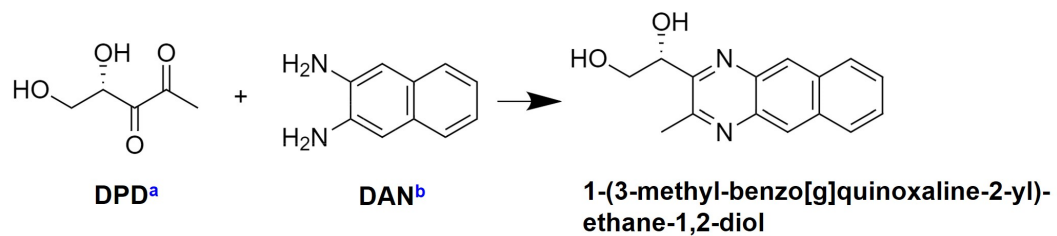

**a**

<sup>a</sup> 4,5-dihydroxy-2,3-pentanedione

<sup>b</sup> 2,3-diaminonaphthalene

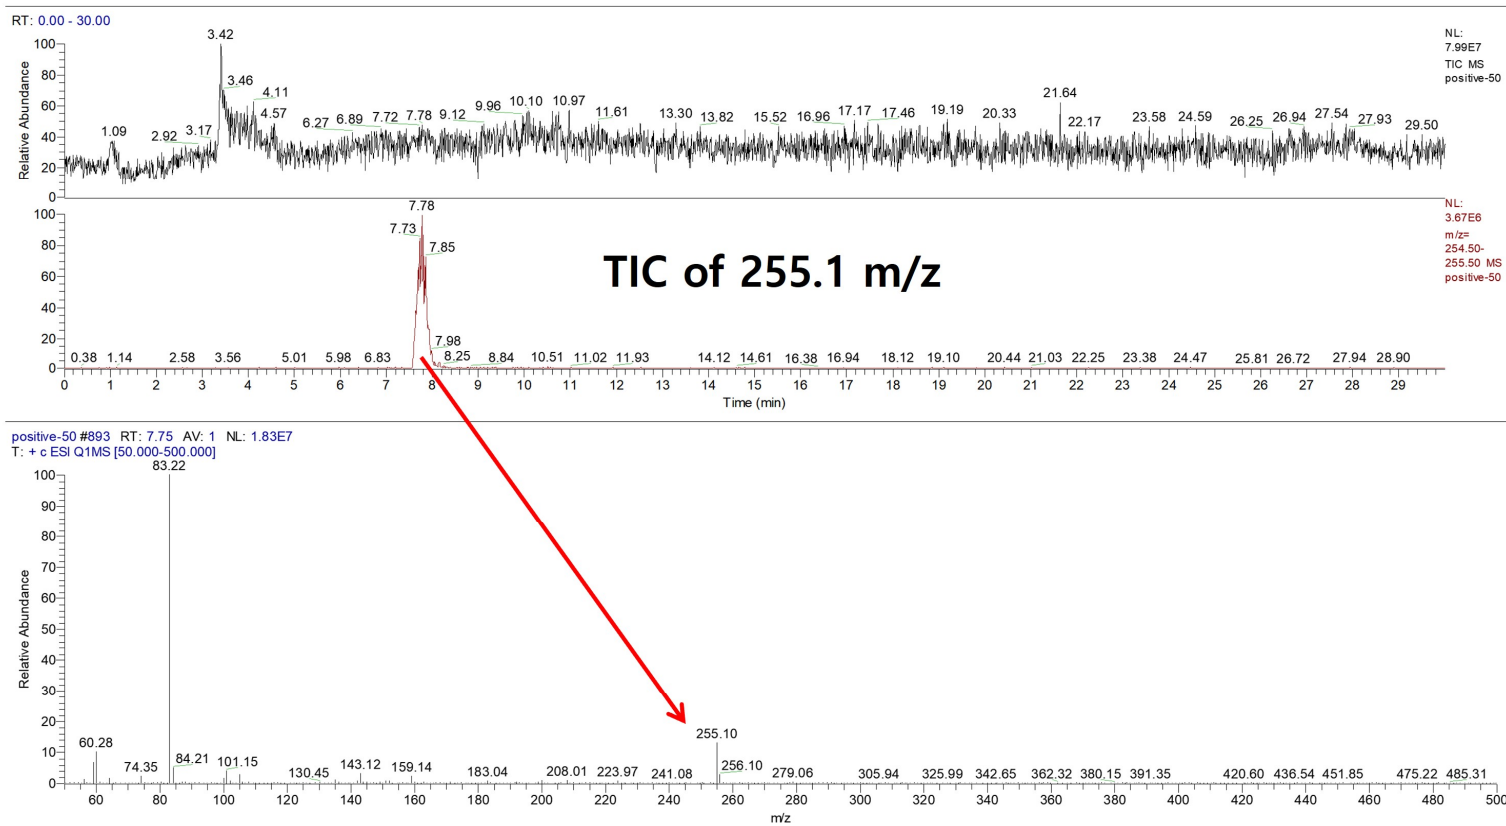

b

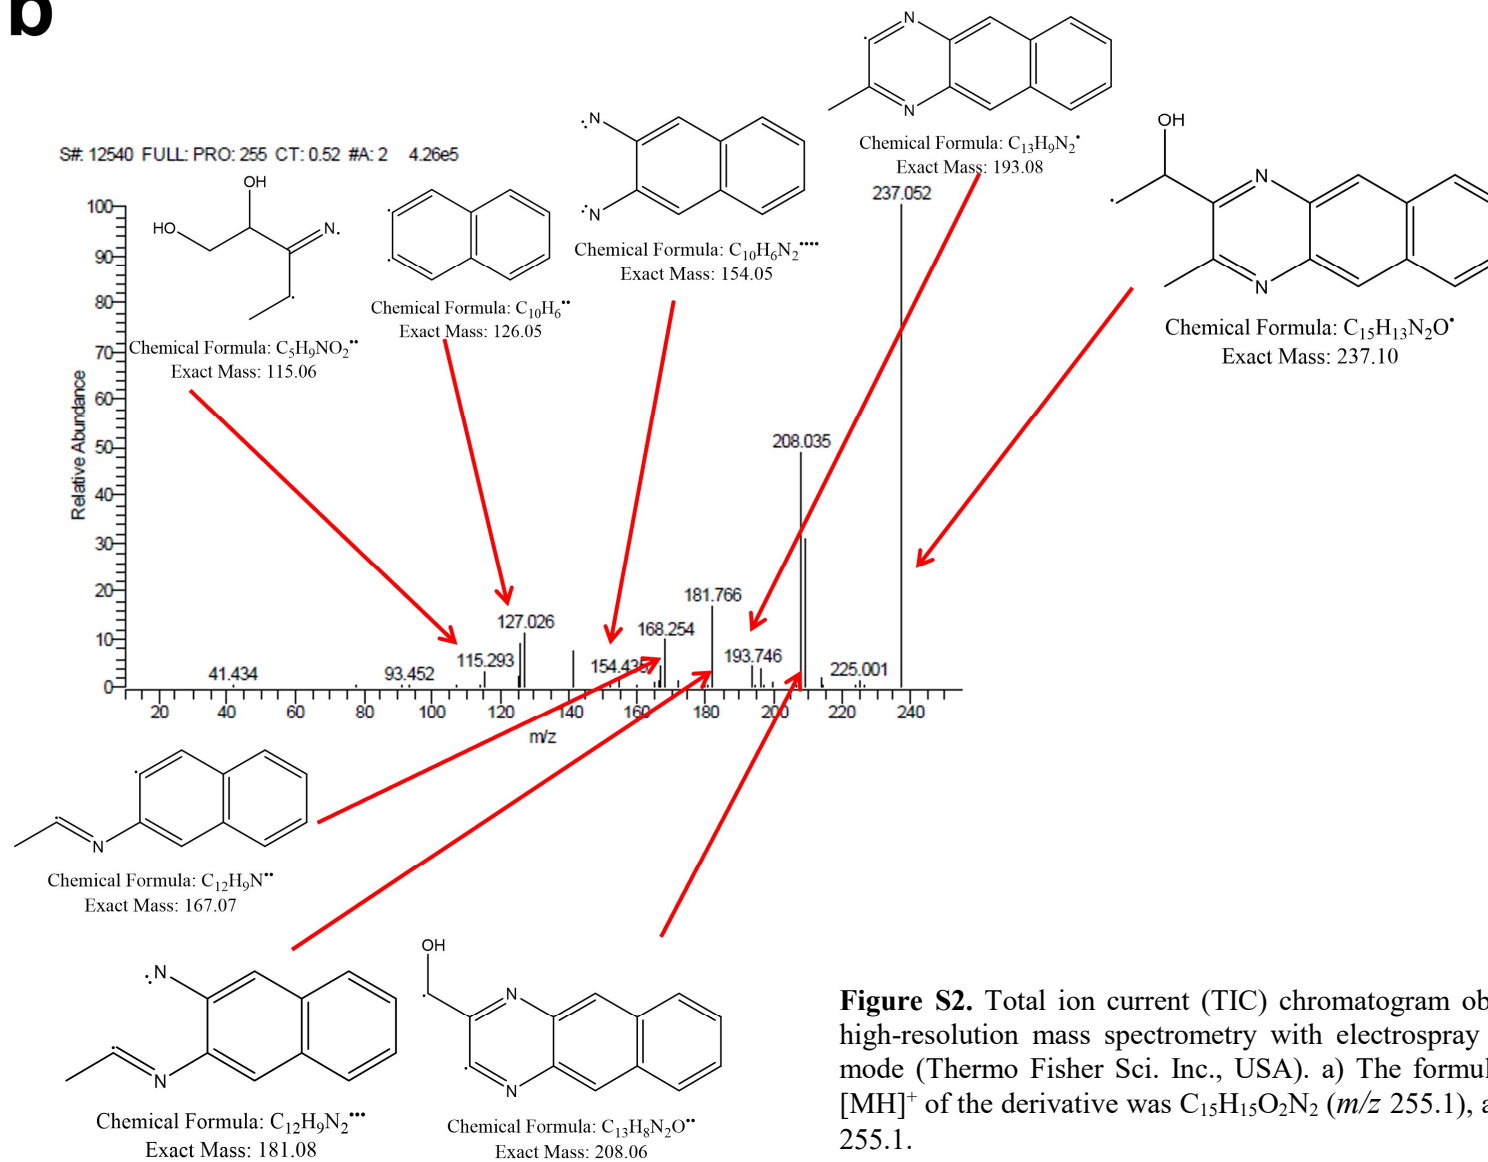

**Figure S2.** Total ion current (TIC) chromatogram obtained with LTQ XL Orbitrap high-resolution mass spectrometry with electrospray ionization (ESI) in a positive mode (Thermo Fisher Sci. Inc., USA). a) The formula of the protonated molecules  $[MH]^+$  of the derivative was  $C_{15}H_{15}O_2N_2$  ( $m/z$  255.1), and b) fragment patterns of  $m/z$  255.1.
